# Supplementary material for: DREAM
Source: Springer Nature journal article supplement (doi:10.1007/s12021-020-09500-9), 2021-01-06
Supplement: 12021_2020_9500_MOESM1_ESM.pdf [file 12021_2020_9500_MOESM1_ESM.pdf]

---

**Appendix: Pseudo-codes of Core Algorithms**


---



---

**Algorithm 1:** Frequency Decomposition,  $O(T_R)$  complexity
 

---

**Input:** double  $T_R$ : sampling rate (seconds), int  $N$ : number of time points ;

**Output:** array  $fbands$ : an array of all the decomposed frequency bands;

```

/* determine the detectable frequencies */
1   $fmax = 1/(2 * T_R)$ ;
2   $fmin = 1/(N * T_R/2)$ ;
3   $j = 0$ ;
4   $fnum = ceil(N/2)$ 
5  for ( $i = 0; i < fmax, i++$ ) : do
6     $freq[i] = fmax/(fnum + 1) * i$ ;
7    if ( $freq[i] < fmin$ ) then
8       $idx[j] = i$ ;
9       $j++$ ;
10   end
      
$$frmin = \begin{cases} freq(idx(j - 4)) & j > 4, \\ freq(idx(j))/2 & else. \end{cases}$$

11 end
    /* determine the usable frequency bands with the N3L theory */
12  $nfcfmin = round(log(frmin))$ ;
13  $nfcfmax = round(log(fmax))$ ;
14 for ( $i = nfcfmin; i < nfcfmax; i++$ ) : do
15    $nfc[i] = i$ ;
16 end
17 for ( $i = 1; i < max(nfc); i++$ ) : do
18    $idxfmin = min(abs(freq - e^{(nfc(N)-0.5)}))$ ;
19    $idxfmax = min(abs(freq - e^{(nfc(N)+0.5)}))$ ;
20    $fbands[i, 1] = freq(idxfmin)$ ;
21    $fbands[i, 2] = freq(idxfmax)$ ;
22 end
    /* modify the min frequency band and max frequency band */
23  $tmpf = fbands[1]$ ;
24 if  $tmpf(1) < frmin$  then
25    $tmpf(1) = frmin$ ;
26    $fbands[1] = tmpf$ ;
27 end
28  $tmpf = fbands\{end\}$ ;
29 if  $tmpf(2) > fmax$  then
30    $tmpf(2) = fmax$ ;
31    $fbands\{end\} = tmpf$ ;
32 end

```

---

**Algorithm 2:** Bandpass Filtering,  $O(N \times T \times \ln N)$  complexity

**Data:** array *input\_mtx* : a  $T \times N$  data matrix, where  $N$  is the number of time points,  $T$  is the number of time series.  
*input\_mtx*( $t, n$ ) denotes the signal intensity of the  $t^{\text{th}}$  time series in the  $n^{\text{th}}$  time point.

**Input:** double *low\_f*, *high\_f*,  $T_R$

**Output:** array *out\_mtx* : a  $T \times N$  matrix, denoting the bandpass filtered matrix

```

1 int f = 0;
2 double fs = 1/TR;
3 if N MOD 2 = 0 then
    |
    |   f[j] = { j           j = 1 : N/2,
    |           N - j       j = N/2 : N.
4 else
    |
    |   f[j] = { j           j = 1 : (N - 1)/2
    |           N - j       j = N/2 : N.
5 end
  /* create a rectangle window according to the cutoff
  frequency */
6 for (i = 0; i < N; i++) : do
    |
    |   ind[i] = { i   (low_f <= f && f <= high_f),
    |               0   else.
    |
    |   rectangle[i] = { 1   ind[i] = 1,
    |                    0   else.
7 end
  /* use fft to transform the time series into frequency
  domain */
8 mtx_fft = fft(input_mtx) ;
  /* ifft with the rectangle to convert data back to time
  domain */
9 output_mtx = ifft(mtx_fft, rectangle)

```
